# Supplementary material
Source: PubMed Central journal article supplement (PMC4553810)
Supplement: pnas.1503362112.sapp.pdf [file pnas.1503362112.sapp.pdf]

# SI Appendix

## SI Materials and methods

### Tomato transformation

#### *Tomato transformation*

For tomato transformation, a 223bp fragment (Fig. S2A) corresponding to part of the highly conserved HhH-GPD domain of DNA glycosylase Lyase was amplified from the *SIDML1* cDNA and cloned in sense and antisense orientation in pK7GWIWG2 (I) plasmid to form a hairpin structure necessary for to RNA silencing. The recombinant plasmid named pK7GWSIDML was introduced in the *A. tumefaciens* strain GV3101.

Subsequently, tomato cotyledon transformation was done as described in Gonzalez *et al.* (S1). Twenty five regenerated shoots were selected from independent calli and cultured as described in How Kit *et al.* (S2). Twenty five kanamycin resistant T0 plants were transferred to the greenhouse and grown to obtain T1 seeds.

Among the 25 independent T0 transgenic plants obtained, 8 including plants 2 and 8, presented delayed and limited ripening phenotypes. Plants 2 and 8 were selected for further studies and self-pollinated and backcrossed, respectively, to generate lines 2 and 8. Backcrossing of the T0 plant 8 was necessary due to flower abnormality. Twenty five T1 plants were grown in each case and were classified based on the level of *SIDML* expression as determined by semi quantitative RT-PCR on 20 dpa fruits and used for preliminary phenotype characterization. No flower abnormality was observed on T1 plants that were therefore self-pollinated. Complete phenotypic and molecular analyses were performed on T2 plant population obtained after selfing of a single homozygote (line 2) or hemizygote (line 8) T1 plant.

#### *VIGS experiments*

For VIGS experiments a 480 bp PCR amplified fragment corresponding to the 5' coding sequence of *SIDML2* was inserted into the PVX vector (21). This part of the gene has no significant homology with any of the other tomato *SIDML* genes. VIGS and analysis of VIGS experiments were as described (21), using 80 independent fruits injected at 12 days post anthesis.

### Molecular Analysis

#### *Gene expression analysis*

Absolute quantification of transcript was performed as described (S3). For each gene, PCR fragments were cloned and controlled by sequencing and a calibration curve was done. For comparative RT-QPCR, experiments were performed as described (S2). Normalization of data was done according to Pfaffl *et al.* (S4) using EF1 alpha as a reference gene and a reference sample. An ANOVA two ways was performed and difference in gene expression levels between Wild Type and transgenic plants were

assessed using a student t test (n=3; \*: p<0.05; \*\*: p<0.01; \*\*\*p<0.001). All primers used for RT PCR analysis are listed in Table S2.

For microarrays analysis, total RNA was isolated from *rin*, *nor Cnr* and wild type Ailsa Craig pericarp samples according to methods as described in (21). The concentration of RNA was determined using an Agilent Bioanalyser 2100 (Agilent Technologies). Total RNA was treated with DNA-free (Ambion) as per the manufacturer's instructions. RNA was then hybridized to the Syngenta Tomato Affymetrix GeneChip.<sup>TM</sup> The microarrays were normalized using the Robust Multichip Average (RMA) method with the Bioconductor Affymetrix package (S5), which both accounts for the background correction using the perfect match (PM) features for quantile normalization of all the arrays (S6) and for condensing probes into probe regions (hereafter referred to as genes) (S7). The expression values are arbitrary units of fluorescence intensity.

A linear mixed model was fitted to the logarithm of the DML data with genotype, developmental stage and gene considered as fixed effects and plant and fruit-within-plant as random terms in the model. The significance of the fixed effects and their interactions were tested using the Variance ratio F- tests output by the mixed model fitting routines within the Genstat 17 statistical package

#### *McrBC-PCR Analysis*

For methylation analysis, genomic DNA were purified from fruit pericarp using the illustra DNA extraction kit Phytopure (GE Healthcare, UK), quantified at 260nm and quality control was performed after electrophoresis on a 1% agarose gel. For McrBC-PCR methylation analysis, 1µg of genomic DNA was digested with McrBC (NEB) for 5h according to manufacturer instructions with or without GTP as a negative control. PCR amplification was performed with 50 ng of genomic DNA with the relevant primers shown in Table S2.

#### *Bisulfite sequencing*

Gene specific BS sequencing was performed essentially as described in (28). Briefly, PCR primers for bisulfite treated DNA amplification were designed with Primer3 (<http://bioinfo.ut.ee/primer3-0.4.0/>) using the unconverted genomic DNA sequence as input sequence. As every C nucleotide can be potentially methylated in plants and in order to avoid any sequence selection bias during PCR amplification, "C" and "G" nucleotides were replaced by "Y" and "R" nucleotides in forward and reverse primers respectively. All primers are listed in Table S2.

One microgram of genomic DNA was used for bisulfite treatment conversion using the EpiTect 96 Bisulfite Kit (Qiagen, Courtaboeuf/France) according to manufacturer's

instructions. The absence of unconverted genomic DNA was assessed processing a whole-genome amplified sample (Whole Genome Amplification (WGA) kit, Sigma-Aldrich) simultaneously with the bisulfite conversion of all samples, which presented a DNA methylation value of 0% for every C position of each amplicon after pyrosequencing. PCR amplification of the selected promoter fragments, purification of PCR products and pyrosequencing experiments were performed as described (S8). DNA methylation patterns were analyzed with the PyroMark CpG software (Qiagen) and by an in-house developed Microsoft Excel Visual Basic Application for Cytosines outside CpG sites. For each sample, average DNA methylation value of each cytosine or cytosine group (CC, CCC) obtained by pyrosequencing of the three regions of interest (CNR, NOR and PSY1) were pooled to generate a matrix. Heatmap representation of the data was then performed using “heatmap2” function of “gplots” package of the R software. Hierarchical unsupervised clustering between columns and rows were computed using Euclidean distance and complete linkage method as agglomerative method.

## **Metabolite analysis**

### *Ethylene production analysis*

Ethylene production was assayed on individual fruit after 2 h by withdrawing 1-ml gas samples from sealed jars. Gas samples were analyzed via gas chromatography (7820A GC system Agilent Technologies, Santa Clara, CA, USA, <http://www.chem.agilent.com/en-US/products-services/Instruments-Systems/Gas-Chromatography/7820A-GC/Pages/default.aspx>). Ethylene was identified via co-migration with an ethylene standard and quantified with reference to a standard curve for ethylene concentration.

### *Carotenoid analysis*

Carotenoid analysis was done as described (S3). Samples from transgenic plants DML2A, B and DML8A, B were compared to those of WT1 and WT2 respectively. Differences between samples were evaluated using an ANOVA and Tukey's test (n=3, \*: p<0.05; \*\*: p<0.01; \*\*\*p<0.001).

### *<sup>1</sup>H-NMR Metabolite analysis*

For <sup>1</sup>H-NMR analysis, polar metabolites were extracted from ground *Solanum lycopersicum* L., cv WVA106 pericarp fruit. Briefly, the frozen powdered samples were lyophilised and polar metabolites were extracted from 15 to 30 mg of lyophilised

powder samples with an ethanol–water series at 80°C. The supernatants were combined, dried under vacuum and lyophilized. Each lyophilized extract was solubilized in 500 µL of 300 mM potassium phosphate buffer pH 6.0, in D<sub>2</sub>O. Ethylene diamine tetraacetic acid disodium salt (EDTA) was added at a final concentration of 3 mM. Each extract was titrated with KOD solution to pH 6 and lyophilized again. The lyophilized titrated extracts were stored in darkness under vacuum at room temperature, before <sup>1</sup>H-NMR analysis was completed within one week.

<sup>1</sup>H-NMR analysis was performed using 500 µL of D<sub>2</sub>O with sodium trimethylsilyl [2,2,3,3-<sup>2</sup>H<sub>4</sub>] propionate (TSP, 0.01% final concentration for chemical shift calibration) added to the lyophilized titrated extracts. The mixture was centrifuged at 17,700 *g* for 5 min at room temperature. The supernatant was then transferred into a 5 mm NMR tube for acquisition. Quantitative <sup>1</sup>H-NMR spectra were recorded at 500.162 MHz and 300 K on a Bruker Avance III spectrometer (Wissembourg, FR) using a 5-mm broadband inverse probe, a 90° pulse angle and an electronic reference for quantification. The assignments of metabolites in the NMR spectra were made by comparing the proton chemical shifts with literature or database values (S9), by comparison with spectra of authentic compounds and by spiking the samples. For assignment purposes, <sup>1</sup>H-<sup>1</sup>H COSY, spectra were acquired for selected samples. For absolute quantification three calibration curves (glucose and fructose: 2.5 to 100 mM, glutamate and glutamine: 0 to 30 mM) were prepared and analysed under the same conditions. The glucose calibration was used for the quantification of all amino-acids, as a function of the number of protons of selected resonances except fructose, glutamate and glutamine that were quantified using their own calibration curve. The metabolite concentrations were calculated using AMIX (version 3.9.10, Bruker) and Excel (Microsoft, Redmond, WA, USA) softwares.

To explore the metabolite multidimensional data set, one unsupervised multivariate statistical method was used on mean-centered data scaled to unit variance: Principal Component Analysis (PCA). PCA was used to visualize the grouping of the different samples without any knowledge of their group. PCA was performed of absolute concentration of 31 metabolites issued from <sup>1</sup>H-NMR analysis of transgenic and corresponding WT controls tomato pericarp fruit harvested at 20, 35, 40, 55, 70, 85 and 110 days post pollination (dpa), using SAS software version 8.01 (SAS Institute 1990).

For individual metabolites, means ± standard deviations (sd) were calculated from three biological replicates. For all biochemical analyses two extractions were completed to measure the concentration of each biological replicate, then the mean of three biological replicates was calculated. Mean comparisons were conducted using an ANOVA followed by Tukey's *t*-test.

# SI Supplementary Figures

**Fig. S1**

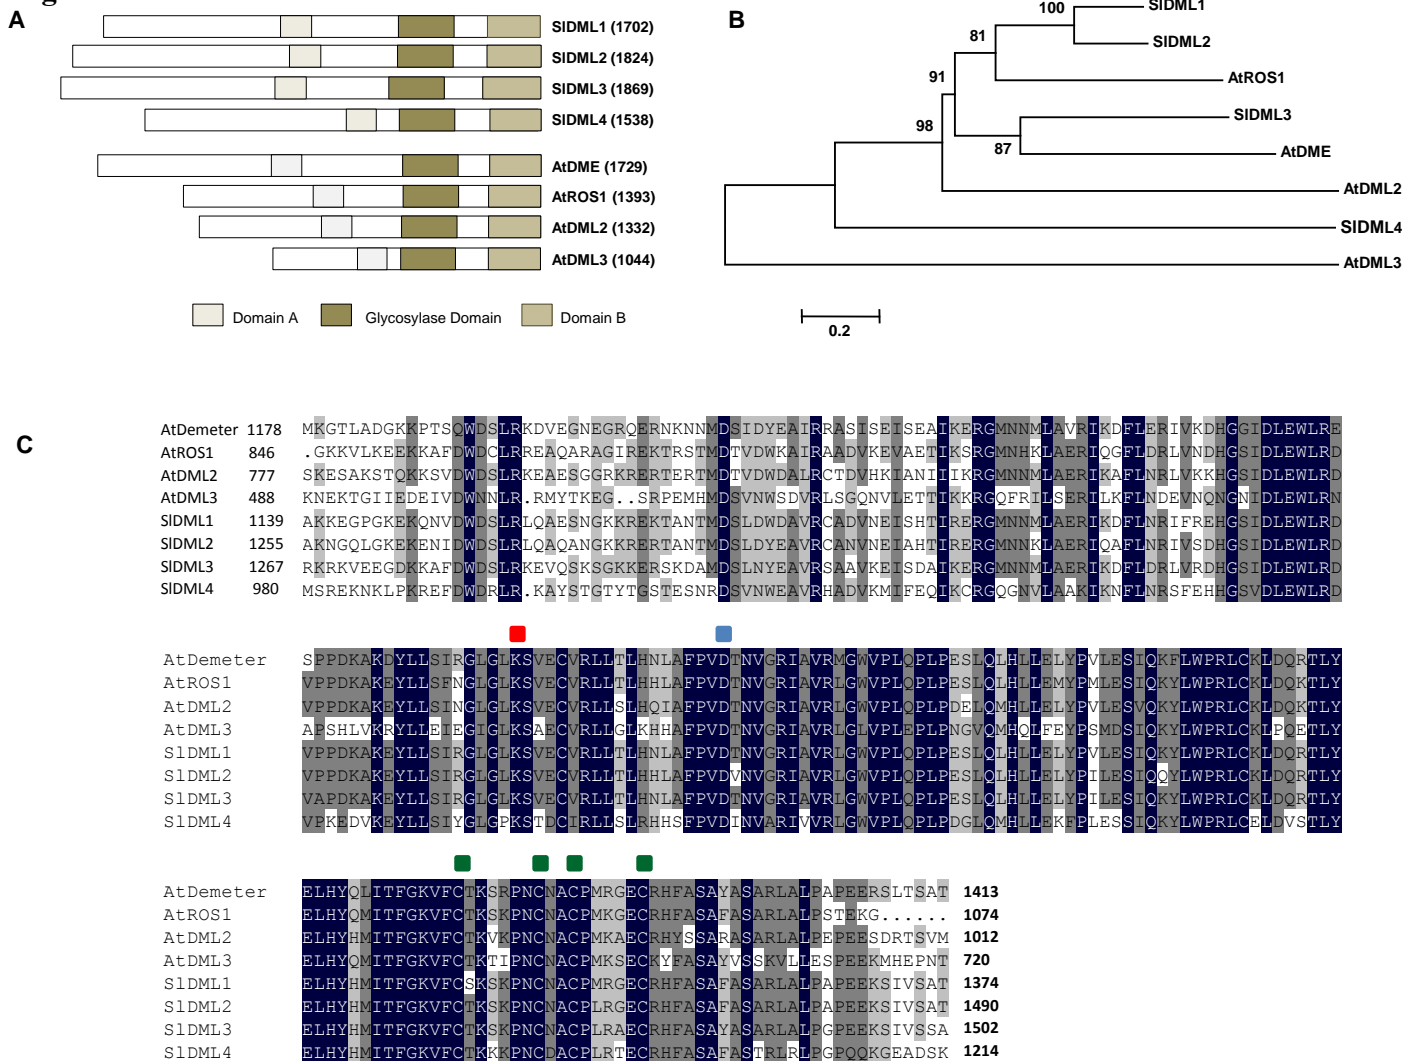

**Figure S1: Comparison of DNA Glycosylase Lyase sequences from tomato and from *Arabidopsis thaliana*.** (A) Schematic diagram of domain structures of tomato and *Arabidopsis thaliana* DNA Glycosylase Lyase proteins. Numbers on the right indicate the number of amino acids in each protein. The positions of the domains are indicated in Table S1. (B) Phylogenetic analysis. An unrooted dendrogram was generated using the Maximum Likelihood method in MEGA v.6 based on the JTT model (S 10). Sequences of DNA glycosylase proteins were aligned using Muscle. The numbers at the branching points indicate the percentage of times that each branch topology was found during bootstrap analysis (n=1000). (C) The Helix-hairpin-helix -Gly/Pro rich domain (HhH-GPD) domain of tomato DNA Demethylase was aligned with those of *Arabidopsis*. Red dot indicates the highly conserved Lysine residue necessary for catalytic activity, blue dot shows the conserved aspartic acid residue present in the active site and green dots show the cysteine residues that constitute a [4Fe-4S] cluster (23). Accession numbers are indicated in Table S1.

**Fig.S2**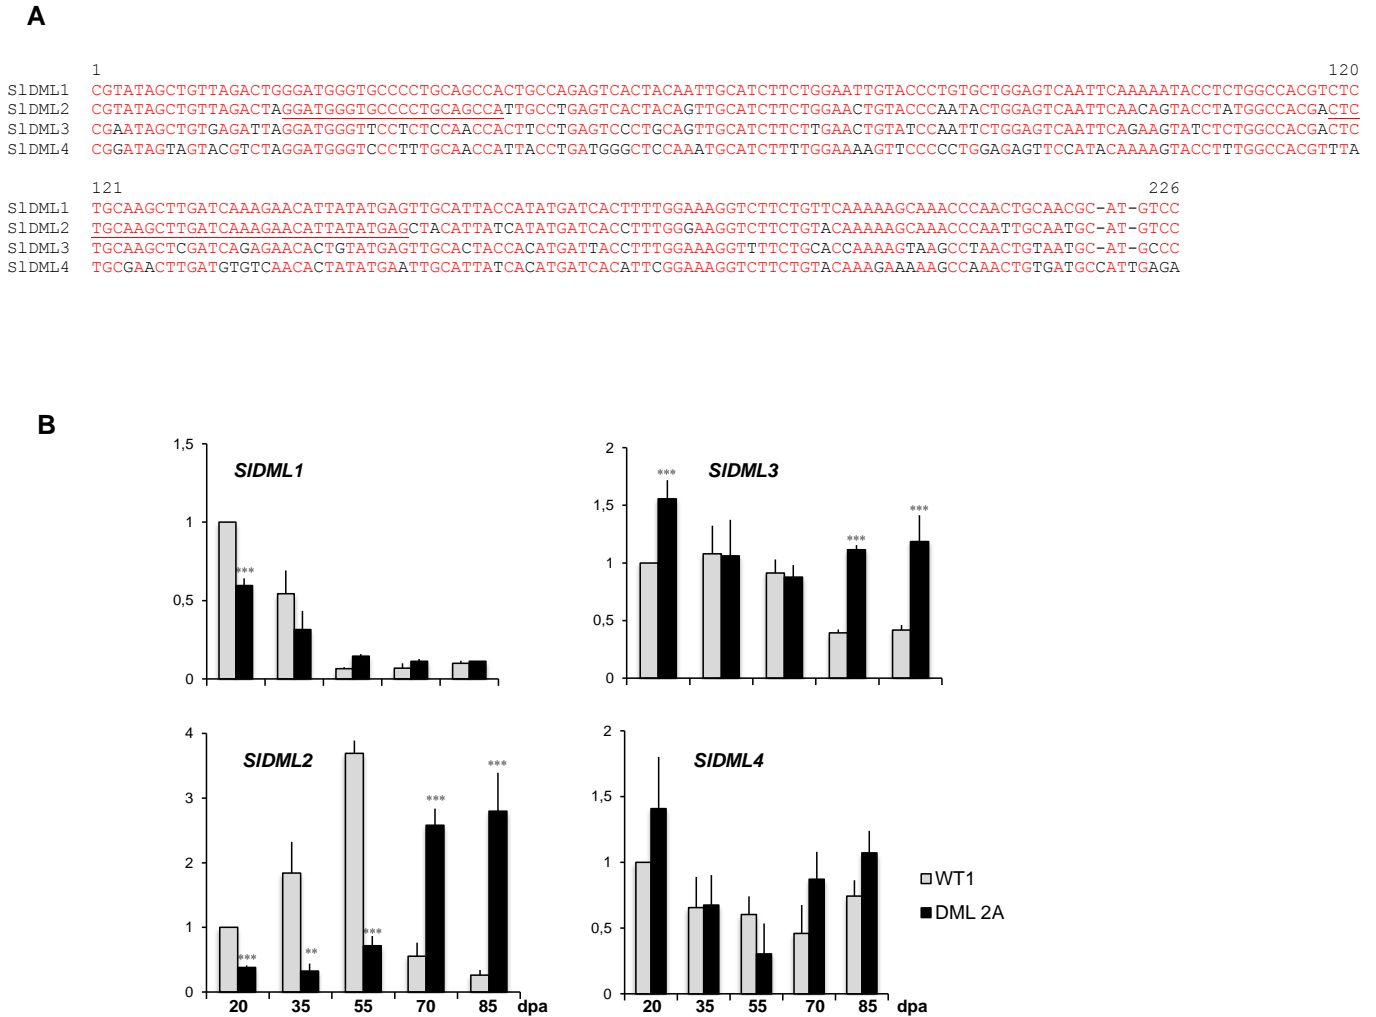**Figure S2:**

**(A) RNAi strategy:** the sequence encoding part of the Helix-hairpin-helix -Gly/Pro rich domain (HH-GPD) of *SIDML1* (+3897; +4123) was used to generate an RNAi construct in the vector pK7GWIWG2 (I). Alignment with corresponding sequences of *SIDML2* (+4252; +4378), *SIDML3* (+4191; +4470) and *SIDML4* (+3328; +3551) are shown. Sequence homology of *SIDML1* with the corresponding domain of *SIDML2*, *SIDML3*, and *SIDML4* is 90%, 83% and 75% respectively. Nucleotides shown in black correspond to differences between *SIDML 2, 3, and 4* and *SIDML1*. Alignment was performed using the multalin software (<http://multalin.toulouse.inra.fr/multalin/multalin.html>).

**(B) Residual *SIDML* gene expression:** *SIDML* gene expression was measured by Real time RT-PCR analysis in WT1 and DML2A (line 2) fruits at 20, 35, 55 (Br+16), 70 (Br+31) and 85 (Br+46) dpa. An ANOVA was performed and differences with WT1 fruits of the same age were analyzed using a student t test (n=3). Stars indicate difference between WT and transgenic fruits of the same age (\*: p<0.05; \*\*: p<0.01; \*\*\*p<0.001). The Br stage (39 dpa) was not analyzed due to a limited number of fruits produced by the transgenic plants of line 2 as explained in the methods.

Fig. S3

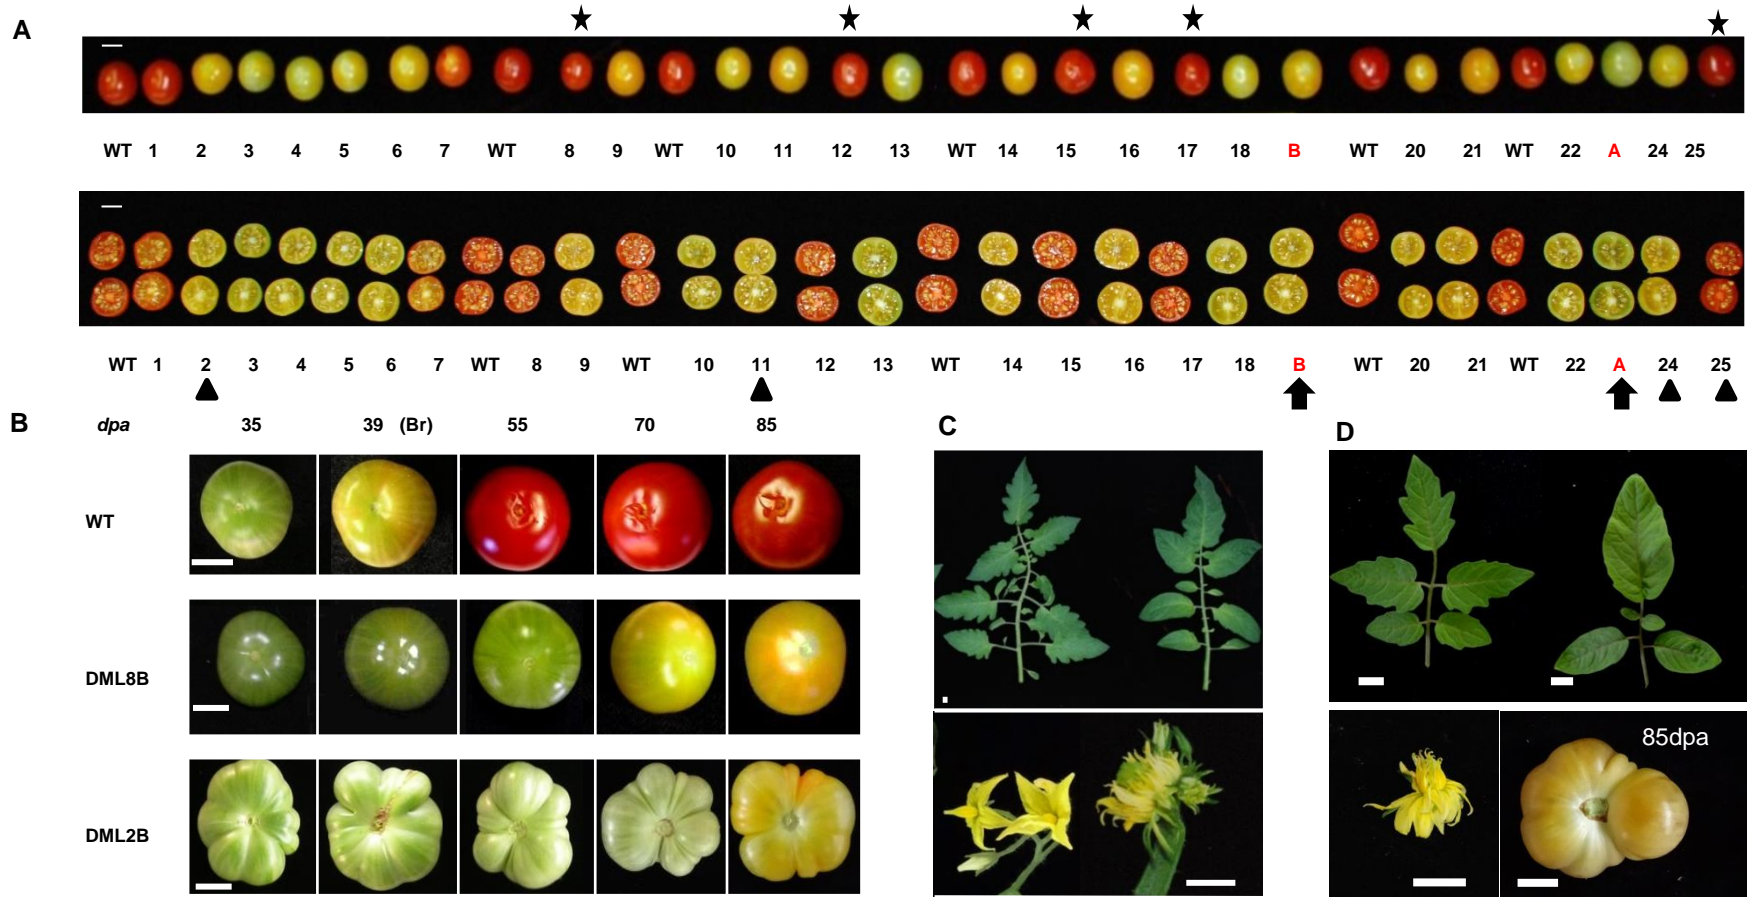

**Figure S3: Fruit, flower and leaf phenotypes of transgenic RNAi plants.** (A) Phenotype of fruits formed on T2 plants (line 8) obtained after self-pollination of a single T1 parent. Fruits were harvested at 85 dpa. Number refers to individual plants from which fruits were harvested. Fruits representative of each plant are shown although on a single plant, fruit phenotype intensity may vary depending on plant age and position of the fruit. ★ indicates azygous plants that have lost the transgene after segregation. In this situation fruit ripening reversed to WT. ↑ design plants DMLA and DMLB that were selected for metabolic, gene expression and methylation analysis. ▲ indicate additional plants used as control for carotenoid measurement and or gene expression analysis and or methylation analysis. White bar: 1 cm. Similar ripening phenotypes were obtained in T2 plants of line 2. (B) Typical fruits of plants DML8B, and DML2B are shown along with WT fruits of the same age. Developmental stages are indicated. Plants of line 8 were self-pollinated whereas flowers of plant 2B required to be back crossed with WT pollen to allow fruit development. Fruits of plant DML2B are characterized, in addition to the delayed ripening phenotype by an increased number of locules. (C) Leaf (upper panel) and flowers (lower panel) of WT (left) and transgenic plants of line 2 (right). Leaf lacks indentation and flowers are *fasciated*. Such flowers need to be hand pollinated and will give fruits with multiple carpels (up to 18 in a few cases). (D) Representative leaf (upper panel) of WT (left) and transgenic T2 plants of line 1 (right). Representative flower (left) and fruit (right) of transgenic T3 plants of line 1 (lower panel).



Fig. S4

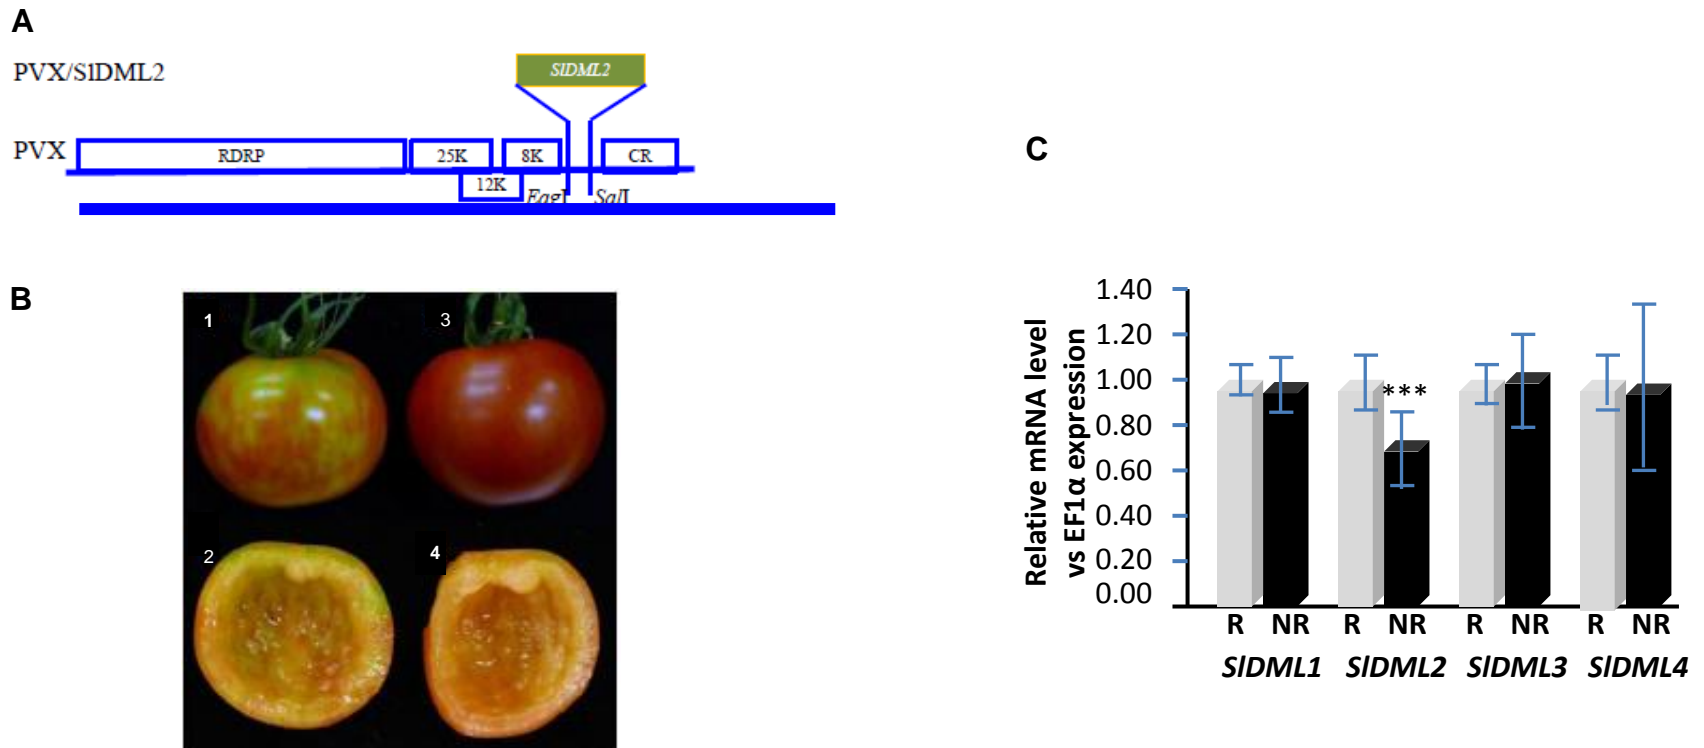

**Figure S4: VIGS analysis of SIDML2 function in tomato fruit ripening.** (A) Construction of PVX/SIDML2. The specific 5' coding region (1- 480) of *SIDML2* mRNA was PCR amplified and cloned into the PVX vector to generate PVX/SIDML2. (B) Fruits from Ailsa Craig plants were injected with PVX/SIDML2 (**1, 2**) or PVX (**3, 4**) at 14 dpa. Fruits were photographed 2 days after the breaker stage (Br + 2, 43dpa); (**2, 4**) Inside of fruits 1-3, respectively. Ripening-inhibited sectors in fruits injected with PVX/SIDML2 remain green.(C) *SIDML* gene expression analysis in ripening (R) and non ripening (NR) sectors of fruits treated with PVX/SIDML2. Values are normalized to EF1 $\alpha$  and to the expression of the corresponding gene in the ripening sectors which represent the 100% of expression level. \*\*\* indicate significant difference ( $p < 0.005$ ) between R and NR sectors as determined with a student t test ( $n=3$ ).



Fig. S5

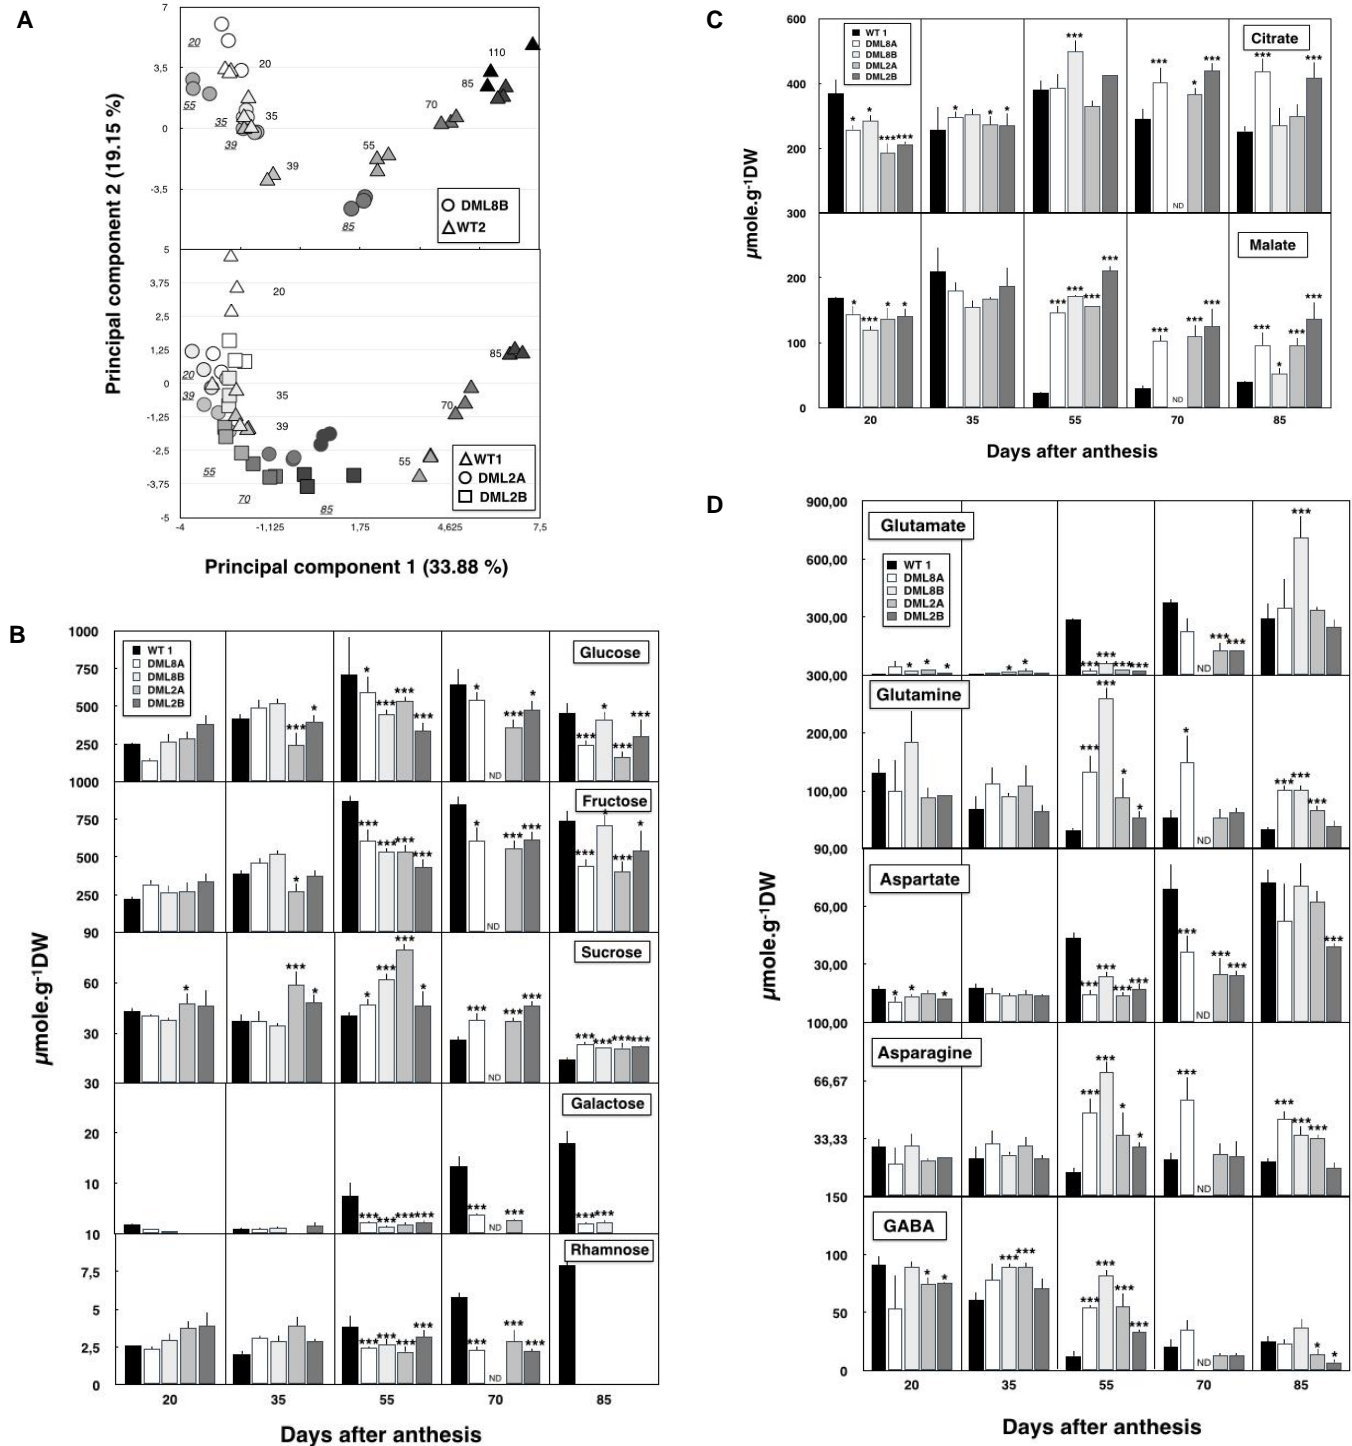

**Figure S5: characterization of the metabolites content of the transgenic RNAi fruits.** (A) PCA was performed with MatLab Software (version 7.4.0) to evaluate the grouping of samples without any knowledge of their group, using the absolute concentration of 31 metabolites determined from  $^1\text{H}$ -NMR analysis of WT2 ( $\Delta$ ) and DML8B (o) [upper panel] and WT1 ( $\Delta$ ) and DML2A (o) and DML2B ( $\square$ ) [lower panel] tomato pericarp fruit harvested at 20, 35, 39, 55, 70, 85 and 110 dpa. PC1, (33.88% of the global variability) separates WT fruits at 55, 70, 85 [upper and lower panels] and 110 dpa, [upper panel] from all other samples. PC2 (19.15% of the total variability) separates fruit samples of WT1, WT2 and transgenic (DML8B and DML2A, 2B) at 20 dpa from 35 dpa and 39 dpa, irrespective to their genotype. (B) Sugar (sucrose, glucose, fructose, galactose and rhamnose), (C) organic acids (malic and citric acids) and (D) amino acids (aspartate, asparagine, glutamate, glutamine and GABA) content was determined by quantitative  $^1\text{H}$  NMR spectroscopy as previously described (Sup ref S11) using for each stage and plant a minimum of 6 fruits in 3 biological replicates. An ANOVA one way was performed and difference between samples were evaluated using a t student test ( $n=3$ ). Stars indicate difference between WT and transgenic fruits of the same age (\*:  $p<0.05$ ; \*\*:  $p<0.01$ ; \*\*\*:  $p<0.001$ ).

Fig. S6

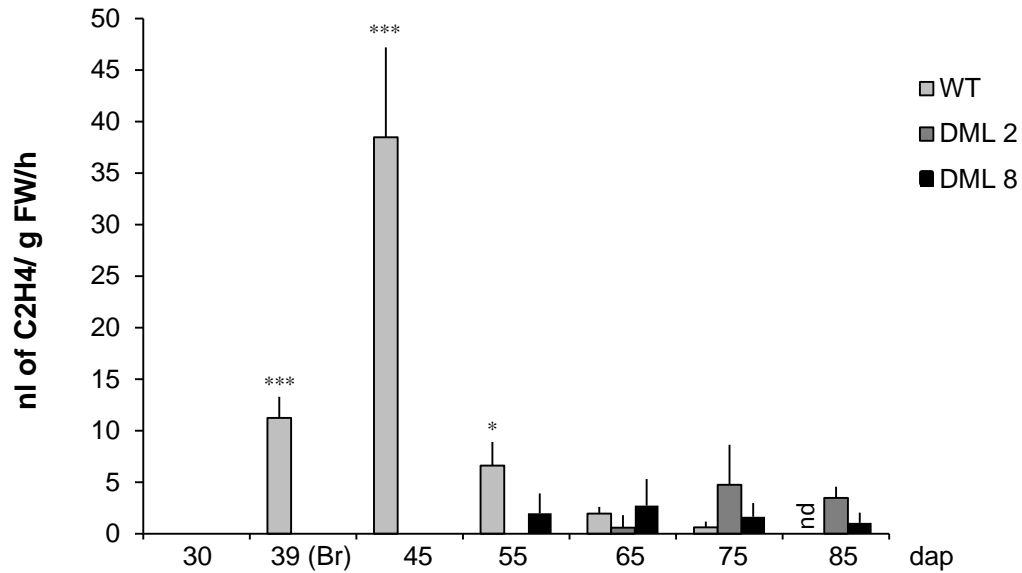

**Figure S6: Ethylene production in WT and transgenic fruits**

Fruits were harvested from 2 (line 2) or 4 (line 8) independent T2 plants at the developmental stages indicated and analyzed individually for ethylene production. Values represent the average of a minimum of 4 to 10 independent fruits for each line and time point. An Anova was performed and differences between samples were evaluated using a turkey's test. Stars indicate difference between WT and transgenic fruits of the same age (\*:  $p < 0.05$ ; \*\*:  $p < 0.01$ ; \*\*\*:  $p < 0.001$ ). The Breaker stage (Br) for WT fruits corresponds to 39 +/- 1 dpa.

Fig S7

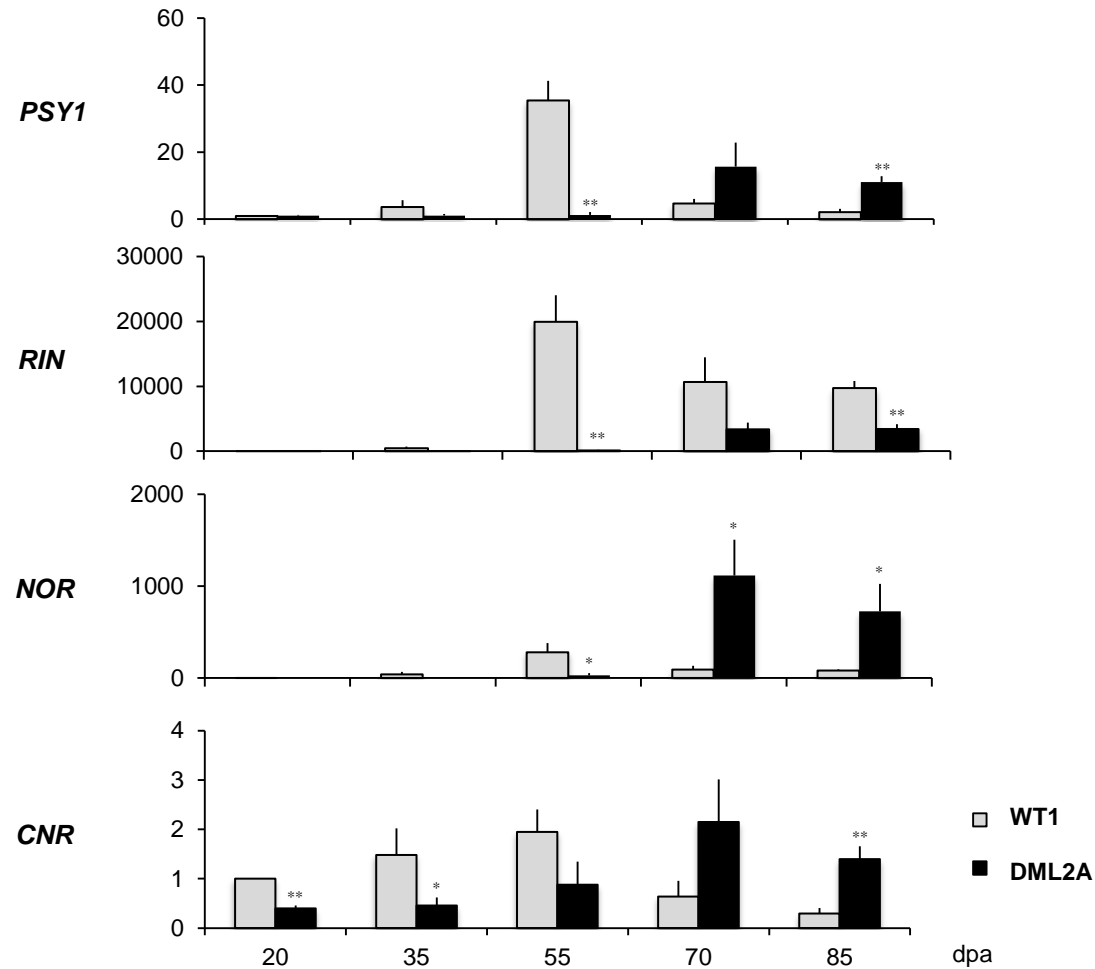

**Figure S7: Candidate gene expression during the ripening of RNAi transgenic fruits of line 2 plants**

*RIN*, *NOR*, *CNR* and *PSY1* gene expression was analyzed in the transgenic plant DML2A during fruit ripening using real time RT-PCR. Primers are listed in Table S2. Values are normalized to EF1 $\alpha$  and to the WT fruits at 20dpa. Stars (\*:  $p < 0.05$ ; \*\*:  $p < 0.01$ ; \*\*\*:  $p < 0.001$ ) indicate significant difference between WT and DML2A plants at a given stage using a student t test ( $n=3$ ).

Figure S8

**RIN (Solyc05g012020).**

-2132

ATCTGGTACATAAACTATTGTGCTTATGTAGAATTTGGGGAAGAAACGTCAAGGAATATA  
ATGTAAGTATAGTAGACAATTTATTTTATCGTATACATTAATAATTATTTTCACGATTC  
GAATATATATAACCGATAGATCACACAATAATAAATATTAGTGTGGCTCATCGAAAACCTCC  
GATGCACCTAATGTTTGCCACTAATTCTTAAGATAGATAACAAACACATCTAAACATTATTA  
ATTAAGTGTATATATACAACATATTTTAACTTATTCTATAACTGGATTTCAATTTAAAAA  
ATAATGATGTGTCATGTCCCAAAGTTAGTTGCACTCTAAAAAAGTTAAAAGGTTTTTAA  
CCAAAAATAACTTCTTGACTATAACAAATTAGAGTTGGAATTAATAATCAAACATATAAA  
AATTGATATTTTAAACAAGTTTACACCATAATGTAGCAATCCATCCTGTTAGTGATATT  
GTCTGCTTTAAATCTAGGAATGTACGTCTTAAATGCGTCATTAGTGGGTAAGACATGC  
TTACTTAAAACACGTCATTAATGAATAAGATTTGTTTACTTATATACTCAACATCTCTCATA  
TATTTTACTGATGTGAAATTAGTTATCTTAAACCGGAATGTCAGTACACTTCATTTGTATC  
TTTTTTTATATGAGCCATTATCATTACATGTAAAAGTGCACCTTAAAGCTGGTTAAGCTT  
ATAACTATAAATTGTTCAATTTTTCTCGTTTAAATAATCAATATCTACTTAAACAAGGCCTGT  
TTAATAGATGATAATAGTTTAAAGTAGAAAAATGAAATTGTAACTTTTTACGACTTTTAAACA  
TTTCAACTATCAGTTAGTAATATGCTCATCCATTACATATTTTAAAGAGAACAAGAACCA  
TTAAAAGGTTAAAACTTATTATAAAGTTAAATATTTTTTCAGTATATATGAAAGGACCTTA  
CAAGTTACAACCTAAATCTTTTGAAAGAAAAGTATCGGTCACTACTAAGTTTTCCAAGAAAA  
ACAACAACAAGGAACAATCTTTTTCTACCACAAGGGGATGTGACTATTGATAGAATCCA  
TTCATTTTAAATGGGAGGGCAATTTTTTTTTAAGCGGATTCAAATATAAAAAAGTAAATAT  
ACGGACAAAAAATAAGAAAATTTATCAACGTATACATAAGAAAAGTTGCATACTTCCA  
AATAGACATGATACATAAACATGATCTTAACTTGACGTCAGTTGGCAACTATATGTGCA  
CAAGTAGGCACTTAACTTGTATAAGATTGAACAATTGACACATTCATCCTACAGGCACC  
CTACATGAAAATTTTGTGTCCTGCGTGGCGTCCTACGTGTATCATGTCATGCATGACATG  
TGTGGCTACTTGTTCATTTTATACAAGAGTAAGTGCCTACTTGTGCGCATCCAAAGTTG  
AGGGTCATAGTTACCGACTGACGTCAAGTTAAGAGTCATGTTTATGTATTATGCCCTCCA  
GGTAACATAGATTTGAAGAAGCATGGAATGCATGTAGATCTTACTTCTCGTGAAAATGGT  
TTTCAAATACGAATAGATTAGTCTCGGCTCAAGTAAACATTTTAAAAGTAAGTACTTAAAG  
ACAAAATAATAAATAAATAAAAAAGTTATGATAATATTAATAATAAAAACTATAGCAAAAT  
ATAATATATTATCGAAGCAAACATAAATGTCTAATTCGAAGCCTCGATAAATGAAAAAATA  
ATCTAATTTGAACACCGCAACTTTCTTTTAAATGGGCCCTCCACGACACTAATCTAGATT  
AATCGAAATAATAAATTCTGAAATACCTCATGATATATAGTAAACAAAAAAGTCTTTATT  
CTCTTTTCTTCTTGACTAGGGAACCATTAGATTTTAAAGACATTAAATCTATTACCCTTAC  
CCTAAGAATAAGAAGATGTAAAGTAGAAGAGAAAACAACCAAAACCATATATATACATAT  
ATATAATTACATTATATTGTCTTATAACATATAGTCTTTTAAAGGAAAAACAATTTAGAAAA  
AAATAATATTATTTTACATTTTTTTTCTTCATACAAT**ATG**

**NOR (Solyc10g006880).**

-2568

TAATTCAAAAGCAAATGAAGGACCATTAAAAATTGTCCAAGTTAGGGCTACTAATTTTG  
AAATAGATTCCACTTGCTTTTTTCTTTAATTAGGTAAGTGCAACATCCATAAATATTTTTCA  
AGATATTTTCCGTAATTCATTCACAATTTTTTTTAAAAGAATTATTTAGTGTTTACCTGTT  
TACATTTATATTGAAATTAATTAATTTAAAATCATAATTAAGAGTGGAGAAATTTCAATTA  
TCAATAACCTAAATACTTAATTCTCCAATGAACTAACTATAAGATTTTTCTCCCTAATAAT  
AGGTTCAATTTATTTTA**GATTGGTCATGTGAAGGATATGTGT**TGAAAC<sup>1</sup>AAAT**CCC**<sup>2</sup>TAAAT  
**TTCC**<sup>3</sup>TTATTC<sup>4</sup>TTGTTAAGTTTAAAAATAAAAAATGC<sup>5</sup>TAAAAAATTTTTTAC<sup>6</sup>AATGAAAGAA  
TATTATAAAC<sup>7</sup>TAATTAAT**CC**<sup>8</sup>**GTCC**<sup>9</sup>AAATTATATC<sup>10</sup>ATAC<sup>11</sup>GTATC<sup>12</sup>GC<sup>13</sup>GAGGATTC<sup>1</sup>  
<sup>4</sup>ATC<sup>15</sup>ATAAATTGAC<sup>16</sup>TAC<sup>17</sup>TAGTC<sup>18</sup>**GTCTGTTGTTGTTCTATCCGAG**TTCAAGATCA  
ACGATACTATATATAAATAC**ATCGATAGAGACAAGTTGTTGTAAA**AAAAAATTC<sup>1</sup>AAGTGT  
GAC<sup>2</sup>AC<sup>3</sup>TAGGCC<sup>4</sup>AAATTTGTCC<sup>5</sup>AAAGAGTAGCC<sup>6</sup>TAGAAATGCTTTC<sup>7</sup>TTATC<sup>8</sup>TTATTAT  
**C**<sup>9</sup>TGTC<sup>10</sup>TGTCG<sup>11</sup>AGTC<sup>12</sup>ATGTC<sup>13</sup>AAACTTC<sup>14</sup>TGTTGTAAAATTTAATC<sup>15</sup>ACTCC<sup>16</sup>TAATT  
**CG**<sup>17</sup>ATATTTCC<sup>18</sup>AAAAATCG<sup>19</sup>AGTTTTGC<sup>20</sup>AAATTAAGAAAATTTCC<sup>21</sup>ATTGTAGGACG<sup>22</sup>AGT

TTCCCTC<sup>23</sup>TTTAATTAATGATTC<sup>24</sup>ATATGAGCG<sup>25</sup>CC<sup>26</sup>ACG<sup>27</sup>AATTC<sup>28</sup>AAC<sup>29</sup>TGAATATC<sup>30</sup>  
AAATAAAATAC<sup>31</sup>TGAATGATTGATATAGATCTC<sup>32</sup>TTTATATATC<sup>33</sup>TTGTGCAGGATAAAGT  
AGTTCTGCGTATATGCCCTTTTACTCGATTGTCCACGTGTTGGTACCAACTTGCATGCG  
TATCGATTAATTATATTGCCTAATTTTCAGTTATCAAGCTCTAATTACATCATTGTGCATGTA  
TTAATCTAATCACCTCTTCAATTTATGCTAATGACGACCTCCACTTCTAATTTAATATTAAC  
ATATACACTATTTATTTTTCCACTAACGACTAATTTTTTTAATTTTTTTTTGACAATATTTAT  
ATAGTAATTTCTGCTAAGGTTAATTCTTAGTTTTTATCAACTCATTTTTACTATATATAATTA  
ATGTCCTTCTCAAAGCCTAATAACGCCCATTTTACGTTAAGTTAAACTGTTAGAATTGAC  
GAAATTAGGATTAATTTTTAAAAAGAATCTTGAAATATGATTTAATATATTCACAAAATTA  
TATCAGAAAAATAAATAAAAAATTTAAAATAAAATTGTGTAAGAAAAAAGAATTGTTATC  
GATTTTAAATAAAAAAGAAAAATAACATATATAAAACGAAAAAAATATATTTTTCTTAGT  
GAGTAGATTTATCCACACTAGTAATTGTGTGATTATTGTAACATATTATTCATTAGTCTAG  
GTACGAATTAATTGACTCGAATATTATCGTCCTAATAAAAAAATATTCTTAATTTTGTCT  
ATTTTTTAATTAGCTTATTCCAAAGTAAAAAAATCAAAGACATGTTCTTATATTTATGAAC  
TTCTTAATTAACATTTATAATTACCACAAGAATCTCAAGACATGTTTATAATTAATAAATT  
TAGATGTCTGTTTTTCTTTCTAATTAATTAATATAATTTTACCTTTGATAGCATATATTTAT  
AATTACCATAGAATTCAAAGCATGTTTACTGTTAGATAAATTTAAATATCTTCTATATTTTC  
TAAAACCTTTGGCGTCCAATTCGATCAAAGTATGTCCACACAATTCATACTACAAAAC  
TTTCTATATAAAGAGAGATAATAGTCAAATACATCTGAAATGTTACGTTTTTTGTAAAATT  
TCTATTTAATTATCACGTGCTCAATTTTTTTTACCTAAATCATTATCAACTATTTAACAAT  
ACACATCTCAATTATCAGTTATTTTTCTTTTTCTACTTGAATACAGTAATATTTTCAGATAAAA  
AAAGAAAAAGAGAAACAATTGATAATTATTAACGCGTGATTTGATAAATAATTAATGAG  
TTTATGTATAAAAAATGAACACCTCATGGTTCAAAAAAAATCTTGCAAAAATATAACT  
CTAGATACTATTTTTTACCATTAAAGTATATATTTCAATATATATATATATATATATATAT  
ATATAACA AAAATATATGTAATGGCATTACTGTAAATTCAGTGTGCTTATACCATATA  
TAAGTAAGTGTGGGGGCTAAATTAACCAACTAAATTCCTTCTGTTTATCATTCTCTCTCT  
TCCAAAAAAAATCCCAAATTTAATCATAATAAATTCGAATTTATCAACCTCGTACTA  
CGTACATATTTTTGTTGGTACGTAAAATACTGAATTCAGGTCAACTCAAACATCGTAAATT  
GTGATTTCTTT**ATC**

**PSY1 (Solyc03g031860).**

-2345

GTTCACAATGTCAAATCTAAACAACATAAAAACGACGAGGAGTAAGGTTTGCAAC  
GACGATAACAAGGATTAGGCAACAATTAGAGTTGTGAATTGTGAGATTAACTAT  
ACTTTTACTATATTAGGCAGAATTTTTGCACTCAATGAGTAACCTTGATTTATTTATT  
TTTTATTTGCCCCTAAATTATTGGACAAGTCATATATTTGTTTTGAAAACATTCTTT  
TATTGGCTAAATCGAAAATTGAATCGTTAAAGATCAAAAATCAATAACAAATATCT  
TATTGGTTTAAACATATTTAAAAATAAAAAACCAATAAATCTAACTAATAATATTTAA  
TACGAAAACGAAATGGACTGACACACATTCCTAAATTTTTGGTCAAATTTTTTTCA  
TAATTTCCCTAAAATCTAAAATATTAATATTTGACGGAAACAAAAAATTCACTTTT  
AATAAATTATTTGAAGGACTAAAACAGTGGAAGAATATATTTAAGAAGCTAATTTG  
AACCTAGTGCCAAATATAAAGGGACCATTTTTGTCAATTTTTCAACTTGAAAATCTA  
CGTGTCTTAATATAACACCAAGAATTAATTTTACTGAAAAAATGTAAAAATGAG  
GATATGGATTCTGAATCACTCAATCCAATCAGCAAAAATAAAAATAAAAATA  
AAATAAAATTTAAAAATAATAATAAATGCTATAAAATGACCAAATGTGTGGAGC  
AAAAAGTGCAGAAAAACCAACAAATTGCATTCTCCATTCTTGGAAGTGGCCATT  
CTTGATTTCTTGAAACAAAGGTTTGTTCCTTCACTTCTTGATATGTAAGTTGC  
AATCTTTATAACTTTCTATTGCTTTGCTAGTGTTTTTGTTATATACAGGGGGTGA  
GTTAGAGGGTAAGTTACGCATTTAGTCGTAACCTTAGTCAAACCTTCGTAATAATTT  
AGTAAGTTAAAATATATTAGAAATTTTCAGAATTCATAAACTTTAAATTTTAAATTTTG  
ACTTCGCTTTGTGTGACTATACAATTACAGAAATTCAGAGTGGCC**ATTGTTGAAAGAGA**  
**GGGTGGAA**TTTGTGTAAGTTTTGTTT**CCTTTC<sup>1</sup>AGTTC<sup>2</sup>TTGATATATAAAGTTGC<sup>3</sup>AATC<sup>4</sup>T**  
**TTAAC<sup>5</sup>ATTC<sup>6</sup>TTTGTTAC<sup>7</sup>TTTC<sup>8</sup>TATAGGTTTGC<sup>9</sup>TAGGTTC<sup>10</sup>GGTTAAATTC<sup>11</sup>AGTAGC<sup>1</sup>**

<sup>2</sup>TTTAGTTTAAACCC<sup>13</sup>TATGC<sup>14</sup>GGAATAGAGAATGTGTAAAC<sup>15</sup>TTTAAACTTC<sup>16</sup>AAATTTT  
GGCTCC<sup>17</sup>GC<sup>18</sup>ATACG<sup>19</sup>AC<sup>20</sup>TAGC<sup>21</sup>GAC<sup>22</sup>TATATAATAATAGGAATTGAGCACTTGGCTT  
TTGATATAGCTTCTATGTGTACCAAAATTAGAAAATCAGGCGATTATTATAATCTTGTG  
ACTAAATATAGAATGCATCCATTACCCCCAAAAGTGTGATTCCACTGTCATAGGAGGTT  
TTTTTTATTTCATTTTATTTGTGCTTTCAATAATGTAGAGTAGTTTTACAAAGATCCTTTCT  
TTGTGACACATGGTAGGTAATATTGCTGATTTTGTGTAGTTTTGGGGTTATAAAGTTTCA  
AATTATTTATACTGGAGGGTAGGGGTGGGGTTGCTATAATGCAGGTTATGGTTTTAC<sup>1</sup>  
GTGAAC<sup>2</sup>AATAATTATTGTAGATAC<sup>3</sup>TAAGAAATCC<sup>4</sup>ACTC<sup>5</sup>AGTGTT<sup>6</sup>TTGC<sup>7</sup>GGTGC<sup>8</sup>  
TTGC<sup>9</sup>TTTTGATTT<sup>10</sup>AGC<sup>11</sup>ATC<sup>12</sup>AC<sup>13</sup>TTGTAGTTGATTGTGTTAGATTATC<sup>14</sup>AC<sup>15</sup>ATTAT  
TC<sup>16</sup>TGTGGC<sup>17</sup>TGTAAC<sup>18</sup>TGTATCC<sup>19</sup>TTGTTAGTTGC<sup>20</sup>TTTGTTC<sup>21</sup>TAC<sup>22</sup>AC<sup>23</sup>TGTTGTT  
TCCCTC<sup>24</sup>TTTTATACC<sup>25</sup>TATTTTGATATGTTGACTCGAACGAGGGTGCATCGGGGAACA  
ACCTCTTACCTCCGTGAGGTAGAGCTATGGTCTGTGTCCACTCTACCCTCCCCAGATC  
CCTCTTGTAGGATTTCACTATATTGTAATATTAACCTGAGGTCCTACTATAGGAGCTCAA  
AACTTCTAATTTTGAATCAATGTCTGGTTATACTTTTTTTGTCATAACTGTATCTCA  
AATGTGGTGTGTTGGTTTATCTCATTTTGCAGAAGTCAAGAAACAGGTTACTCCTG  
TTTGAGTGAGGAAAAGTTGGTTTGCCTGTCTGTGGTCTTTTTTATAATCTTTTTCTA  
CAGAAGAGAAAAGTGGGTAATTTTGTGTTGAGAGTGGAAATATTCTCTAGTGGGAAT  
CTACTAGGAGTAATTTATTTTCTATAAACTAAGTAAAGTTTGGAAAGGTGACAAAAA  
GAAAGACAAAAATCTTGAATTGTTTTAGACAACCAAGTTTTTCTTGCTCAGAAAT  
G

**CNR (Solyc02q077920).**

**-3526**

TCACAATCACAAGCAGGCAGTGAAACAATTACATCAAGCTCGTTTCATAGATTCTTCATT  
TTGGAATAATAGCTTGTACACAGAGTCTGTTCCCTTGTTCCAAATTAGCAATTTCTGCGCAC  
AAATAATAAATCCTCGTCAAATTCGATCTATCAAACGCTCCTTGTATTCATCCCATACCT  
TCTTCGCAATTGAAGCATAAACTATGCTTGGCATCAAATCAGCTGTAACAGTACTTCCTA  
TCCATGATAACACAATTGCATTAAATTTTCCCATTACGCTTCTAGGTCTCCTTTAACTT  
ACTCTTTGTGCAGTTCCATCCACAAATCCAAGTTTTACTTTGCCTCGCAGTGCTAGTTT  
CATCGATTTGCTCCATAGAGAGTAGTTCTCTGGTCCCTGTGAGTTTGATCGGAGTTATTAC  
TAAGTCTGGAGAATCAGAAGCTTAAGATAGAGAGGATGATGATGATTAATTTTTGTTG  
C<sup>1</sup>AGC<sup>2</sup>TGGAAC<sup>3</sup>TCC<sup>4</sup>ATC<sup>5</sup>TGTAGC<sup>6</sup>AC<sup>7</sup>ATTGTTCTCC<sup>8</sup>TGTC<sup>9</sup>ATTTCC<sup>10</sup>TAAAC<sup>11</sup>TAATT  
GATTGC<sup>12</sup>GATTAAC<sup>13</sup>TCC<sup>14</sup>AAATTC<sup>15</sup>TAAGC<sup>16</sup>T<sup>17</sup>AGC<sup>18</sup>TGAAGGTGAGATC<sup>19</sup>GCC<sup>20</sup>GCTC<sup>21</sup>  
<sup>22</sup>TGATAACC<sup>23</sup>ATGTTAATTTGTAGTTATGTATGTAGAATTTATGGTGAATAAGTTC<sup>24</sup>ACC<sup>25</sup>A  
TTGATGAATTTTC<sup>26</sup>AAGCTGCTACAGAGATATTGGAAGA GAAAAAGAGGATCACTATT  
TCATTGAATCTAAATTGAATTATCTTTTTTAAATCATAATTGATGGCTAGTACTGTTATAGG  
TCCAGCTAACCTACTTCTAGAAAGTTCCATTTTAACTGACCTCATAACAAATTGTAACATAA  
TTTTGTTAGCTACATCACAATGACACTTACAAGAATAACAGTAATAAGAAACAAGTTATT  
TCAACAGCTATCATTATTATGTTACCTCATCTTGTATCGTGTTAATCCGTACAGACATAA  
TTAAAATACAAAATAAGAAAATTAGAAGTACAGGCTCTAAACAGGAAATTTTCCAGGAAGTT  
CCACCTCTGCCTAGCTATATTACATGATTTAAAAGGTATAATACAAGATGAACTCCTTAA  
ATTATCAGAATACTTTTTGTTTAAAAACTCGAATTACCCGTTGTTTCAATTGATGAAGTGT  
TTAATCTGACACTTCCGGTTCGTTGTTATTCTATACTAGATTGTTAAGTTAACCACATAT  
TTTTTTAATCACACATTTACCTCAATAAGATATAAACTTTAAATATTTTCTTCTTGAGTT  
GATACATATTATTATGAGATGACATATTTATGTGGTTAACTTAATTATGCGATAGACAAAT  
AAAAACACGTGCAAAAGTTCATTCAAATTTAAATTTAACGTGACTACTTGGAAACATTTT  
ATTAGAAATTTAGGTGTTCAAGTTAAATAAGACTTATTGAAGTATCTAACAGAAATATCCT  
GACAAATTAAGGGACTTATCATGTATTATGCCCTTCAAAAAGATTACTTCTTTATTAATGA  
TGATTAGTTATACTCATAAGTAATAACCTCACTTCTTTTTTCCAGCCCATGTCCTAACCTTGT  
TTTGTCTTCTTCCAATCATGGAGTCCCTTTGTCATTTGTCTATCAGTTTGTAGCCTCCCT  
TCACTAATAATTATCCATAACCGGCTAATAAAGTACATTCCATTTAAGTGTAAGAAAAA  
TTGAAGAGTTTGCCTATTCTTTCTACCACGTCTCCCTAGAAAGTTCTCGTCACGCTTC  
ATTGTCAATTGTCAATTCCTTCGACAACAAGGGAATATATAGTTGGAATACTTCTGTCCCA  
TCCATCCTGCCTACACACAAGTTATTCACTAACCTGTCTTTGCCTACTAAGATACGTCT

AGTTCTTCCTCTACTTGCCTATCTCGATAGAAAAATTTTTGATAGGAAAGAAAAAACTGA  
 TCGAAGCGAGAGAGGGAGCAGTAATGAGGAATATACAAATAAGGTCATTTTTGGGGAACC  
 ATTAAGCTATAAAAACAATAATACACACTTATGAATTACCGATATATAATTTAATTTGGAATT  
 TCATTCATATGGTTAATAGCAACAGAGTTGTCTTTGTATTAGTGCACACTATCAATTTAATAC  
 CTAGCTGTGACACTAAAAAGCTAGGTGCCACAATTATTAACAAAAGTGTATCCACCT  
 CAAGAAGAAGAAAAAGGCAAATATGATATAAAACCATTTAACAAAGTCCATATCACAAA  
 AATTAGACGGCAAATCATAACGACTAATTTATAGATTCACTGAACCATGCAATTCTATA  
 CCGTTCACTTCCAATAAAATAAACATAATACACTATGTTTAGAGTACAAGACTCTCCTTGC  
 TTGAAAAGGACTACCAAGTAGGGGTTACTGCAGTGACTACCAAGTAGGGGTTACTGCAG  
 TCATTTGTTAATTCATTTTGAGTAATGTAAGTGTGCAAGATAATGATGTTTTTTTTCTTTT  
 TGGTTAACTAAGATAAT**TGATGGATTAGGTAGATGAATTAGAC<sup>1</sup>ATC<sup>2</sup>**TAGTGATAATGG  
 AGAGCC<sup>3</sup>AGTGC<sup>4</sup>AAC<sup>5</sup>AATTGAGC<sup>6</sup>ACTC<sup>7</sup>TAC<sup>8</sup>TGGACC<sup>9</sup>GAC<sup>10</sup>ATGGAC<sup>11</sup>AAC<sup>12</sup>TGAGA  
 GACC<sup>13</sup>AAC<sup>14</sup>TTGC<sup>15</sup>AGTATTATAATAGTGC<sup>16</sup>AAATTATAGTTTAGT**C<sup>17</sup>GACTCCCTTC<sup>18</sup>G**  
 GAATC<sup>19</sup>TAC<sup>20</sup>TAC<sup>21</sup>ATAAAGAAC<sup>22</sup>TACC<sup>23</sup>ATAAAC<sup>24</sup>TATGTTAGATGGC<sup>25</sup>TATTAC<sup>26</sup>GGA  
 GTTAAATTAAC**T<sup>27</sup>GAAAATATC<sup>28</sup>AGAAAAAGAACTTC<sup>29</sup>AACC<sup>30</sup>AATTAC<sup>31</sup>AATG**  
**C<sup>32</sup>ATACCC<sup>33</sup>TTATC<sup>34</sup>AC<sup>35</sup>AAGTGAAAAAGAGTAAAC<sup>36</sup>GTGCC<sup>37</sup>AACTC<sup>38</sup>TTTTGATCCC**  
**TCC<sup>39</sup>AAAGCTAGAGGAAAAGAGTGAGCAA**TTCACTACAAACCCTGGCTTTGGTCTAT  
 GTTGACACAACCTCCTCGGCTAATTGGTCAAAATATCTTGTGACCACCAACCAGCAAGC  
 ACTAAATTGGATGTTCTATCAGCTTCTTTACATCATAAAACAGTGAATACTGAACGCTGA  
 GAGGCTAACTGACTGCCCAAAAAAACCTTGACAAAAAGTTAGTGGAGTAACTACCTAGG  
 AGTAAATTCATAGTAGACCTTGAAAAGAACTTTAGCAAAGTCATCATAAATGCTCTTCAC  
 GTCTCATGTACTATGTTAAGGAATGGTCACATTTCTCTCTGCATTAAGCTAGTTCATGTT  
 AAAAGTTGAGGCCGGTAGTAGTTTCAACTTTCAATTTAATTCCACCTTTCTGGCCCACT  
 TCTGTACGGAACACCAATCAGAATCTTTAGTTCATCTTAACACCAAAGCATCTCCACTTA  
 GACTTACTAGACTTCACATAGGAGGAAAAATATGGAAGTGGTGGTCCCTCACACGTAC  
 TTACCTTTCTTTTTTACCTTTGTTCAAGTTTCATACTCTTTTATCTGGCTTCCCTCACTCTA  
 TTTTGGCCCAATAGTTTCTCCTCACAGGG**ATG**

**Figure S8: Promoter sequences analyzed using MCR-BC PCR and bisulfite Pyrosequencing**

Promoter sequences of *RIN*, *NOR*, *PSY1* and *CNR* genes. Bases are numbered from the ATG. Fragment analyzed using MCR-BC-PCR (Fig. 5) are shown in italic. For the *NOR*, *CNR* and *PSY1* promoter fragments, sequences analyzed by Bisulfite-pyro-sequencing are underlined and limited either by red primers (PCR fragment 1) or by blue primers (PCR fragment 2). For each fragment analyzed by BS pyro-sequencing cytosines or group of cytosines for which the methylation level has been determined, have been numbered starting from the 5' part of the amplified sequence. ATG is shown.



**Fig S9**

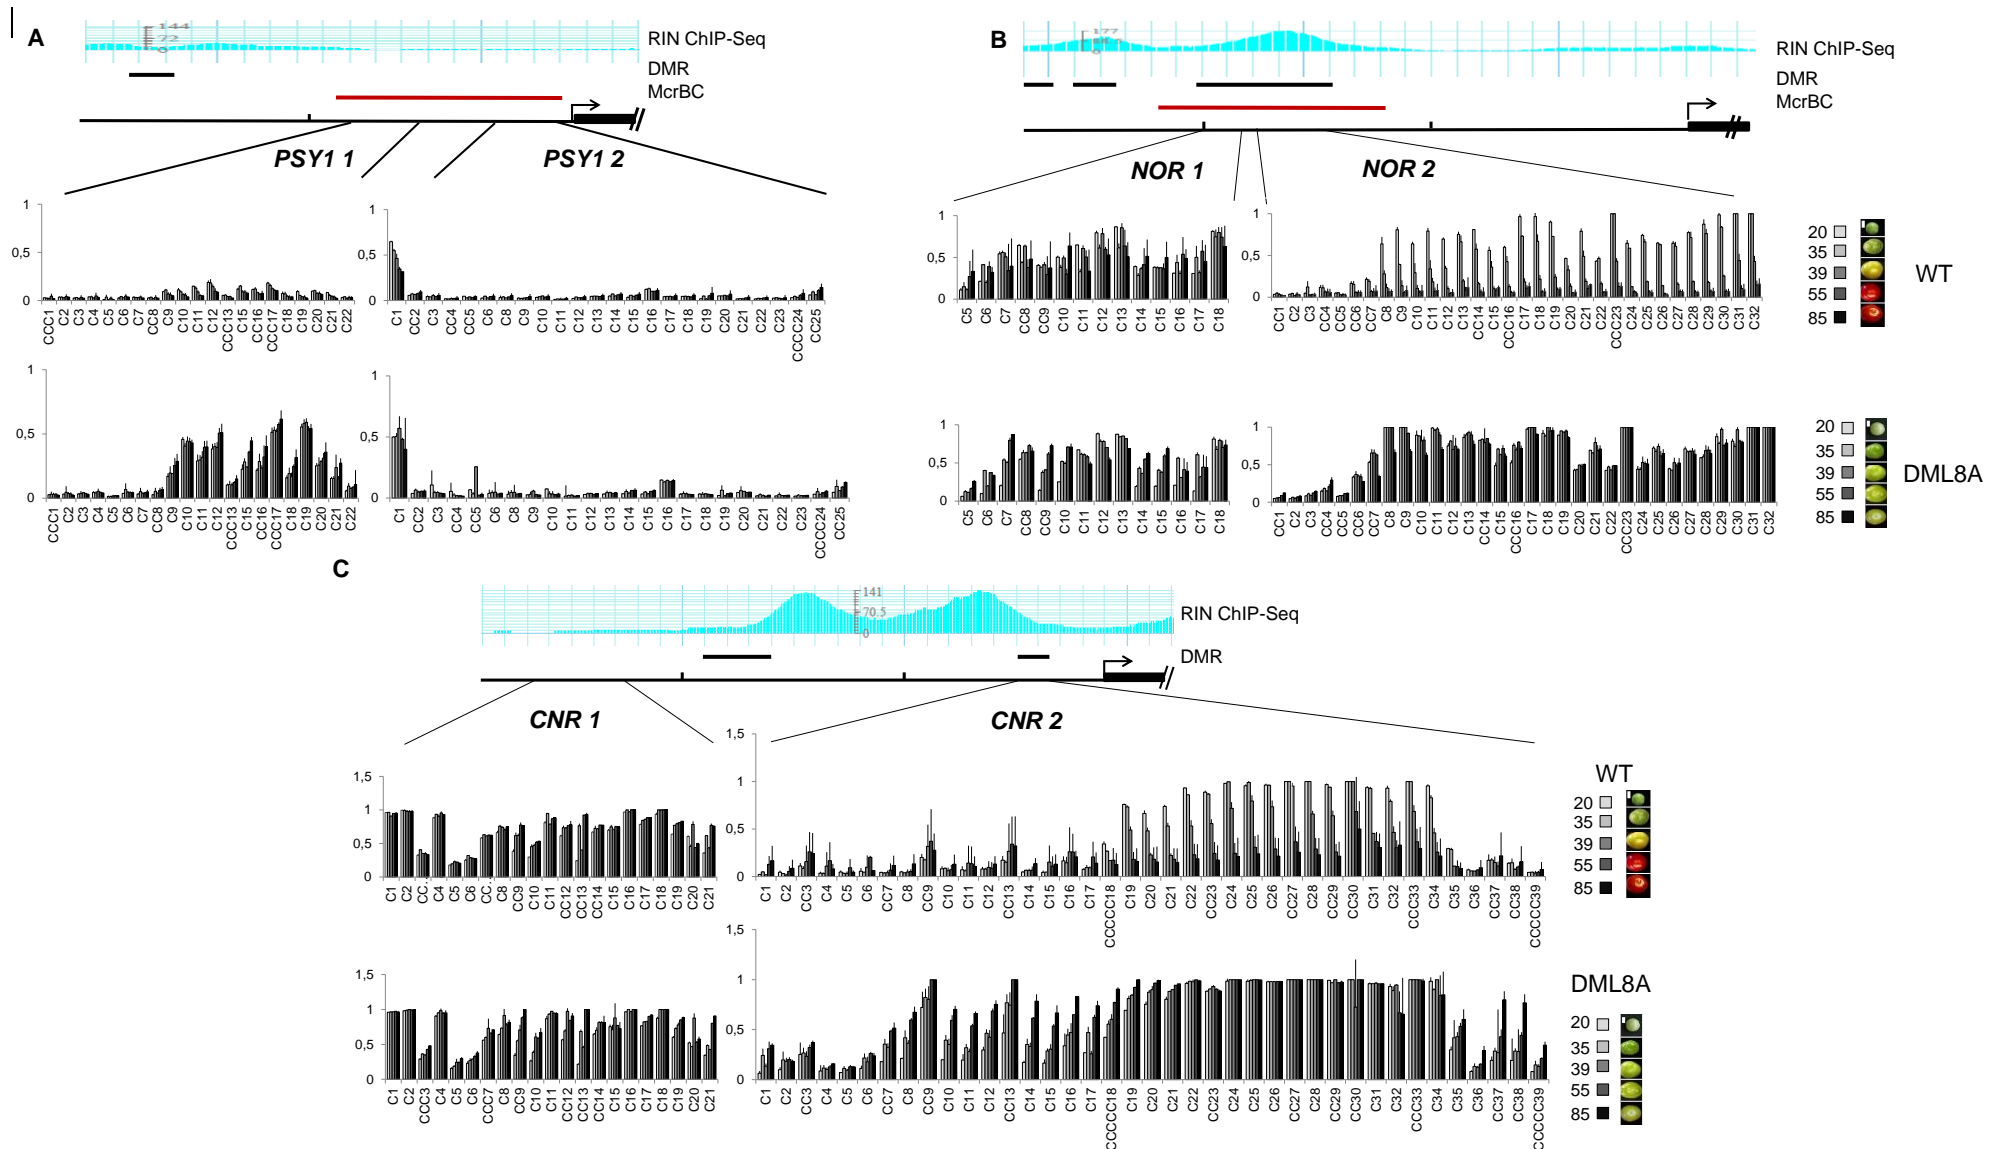

**Figure S9: Gene targeted Bisulfite Pyrosequencing Analysis:** Methylation levels of the *PSYI* (A), *NOR* (B), and *CNR* (C) promoters at the two PCR fragments shown in Fig. S8. Methylation level at 20, 35, 39 (Br), 55 and 85 dpa is shown in WT fruits (upper panels) and in the transgenic RNAi line DML8A (lower panels) at the same stages. Fruit phenotypes are indicated on the right. DNA sequence is depicted as a black line on which are shown the differentially methylated regions (DMR) as determined using McrBC-PCR (red lines, this study), DMRs identified in (20) (black lines) and the position of the RIN BS identified by RIN-ChIP sequencing (20). Note the higher methylation level of *PSYI* fragment 1 (A; CC8 to C22) at all stages observed in plant DML8A as compared to WT as well as the reduction in methylation at the *NOR* (B) and *CNR* (C) fragment 2 during WT fruit ripening but not in fruits of the DML8A plant .

# SI Supplementary Tables

## Supplementary Table S1:

| Database and Accession numbers |                    | Name   | Domain A |          | Glycosylase domain |          | Domain B  |          | Total size (aa) |
|--------------------------------|--------------------|--------|----------|----------|--------------------|----------|-----------|----------|-----------------|
|                                |                    |        | Position | size(aa) | Position           | size(aa) | Position  | size(aa) |                 |
| SGN                            | Solyc09g009080.2.1 | SIDML1 | 691-811  | 121      | 1151-1366          | 216      | 1498-1702 | 205      | 1702            |
|                                | Solyc10g083630.1.1 | SIDML2 | 846-966  | 121      | 1267-1482          | 216      | 1615-1824 | 210      | 1824            |
|                                | Solyc11g007580.1.1 | SIDML3 | 836-955  | 120      | 1279-1494          | 216      | 1645-1869 | 225      | 1869            |
|                                | Solyc03g123440.2.1 | SIDML4 | 786-900  | 115      | 992-1206           | 215      | 1346-1538 | 193      | 1538            |
| NCBI                           | NP_196076.2        | AtDME  | 678-796  | 119      | 1190-1405          | 216      | 1530-1729 | 200      | 1729            |
|                                | NP_181190.3        | AtROS1 | 508-626  | 119      | 857-1072           | 216      | 1191-1393 | 203      | 1393            |
|                                | NP_187612.5        | AtDML2 | 477-595  | 119      | 789-1004           | 216      | 1129-1332 | 204      | 1332            |
|                                | NP_195132.3        | AtDML3 | 331-445  | 115      | 500-712            | 213      | 841-1044  | 204      | 1044            |

**Supplementary Table 1:** Tomato and Arabidopsis *DML* genes Accession number of the tomato and Arabidopsis Demeter like cDNA is indicated together with the size of the corresponding proteins, and the position of the three conserved domains characteristic of the DNA Glycosylase-Lyase<sup>23</sup>.

## Supplementary Table S2: list of primers

| Supplementary Table 2                                   |             |                          |
|---------------------------------------------------------|-------------|--------------------------|
| <b>Primers for qRT-PCR</b>                              |             |                          |
| NCBI Accession                                          |             |                          |
| AK326269.1                                              | EF1alpha F  | GCTGTCGGTGTGTCAAGAAT     |
|                                                         | EF1 alpha R | CATCACACTGCACAGTTCCT     |
| XP_006341256.1                                          | SIDML1 F    | GGGCTGAACAAGCTAACAACA    |
|                                                         | SIDML1 R    | TGACCACCCTAAGTATCAGCTACA |
| XP_004249459.1                                          | SIDML2 F    | AGTACTCATGCCAAAGCCAAA    |
|                                                         | SIDML2 R    | CCTATCTTCTTTTACCGACTGGA  |
| XP_004250000.1                                          | SIDML3 F    | GCAGAATTGAAGTCACCCTTG    |
|                                                         | SIDML3 R    | GATGGCTCAGTTTGTGAGCA     |
| XP_004236376.1                                          | SIDML4 F    | GAGCGAGTGTGGGAACAAC      |
|                                                         | SIDML4 R    | ATGCGGGCAATGAATGAGTC     |
| NM_001247741.1                                          | Rin F       | AACATCATGGCATTGTGGTG     |
|                                                         | Rin R       | GTGTTGATGGTGCTGCATTT     |
|                                                         | Psy1 F      | ATCTTTGGTCTTGTACCGCAA    |
| KC767847.1                                              | Psy1 R      | GGCAGTTTTGTAGGAGGCACA    |
| NM_001247249.1                                          | NOR F       | AGAGAACGATGCATGGAGGTTTGT |
|                                                         | NOR R       | ACTGGCTCAGGAAATTGGCAATGG |
| XM_004232854.1                                          | CNR F       | GCCAAATCAAGCAATGATGA     |
|                                                         | CNR R       | TCGCAACCATACAGACCATT     |
| <b>Primers for RNAi construction</b>                    |             |                          |
|                                                         | DMLENTRS    | CACCGTATAGCTGTTAGAC      |
|                                                         | DMLENTRAS   | GAACATGCGTTGCAGTTG       |
| <b>Primers for McrBC analysis of promoter fragments</b> |             |                          |

|                                                  |                        |                                   |
|--------------------------------------------------|------------------------|-----------------------------------|
| Solgene accession                                |                        |                                   |
| Solyc02g077920                                   | CNR F                  | TGAGCATCAACCACTCCTAATA            |
|                                                  | CNR R                  | CAGACTTAGTAATAACTCCGAT            |
| Solyc03g123630.2.1                               | PM F                   | AACTAGACCATGAGTGTGAGA             |
|                                                  | PM R                   | TTTTAGAGTGAATTACAGAGAAGC          |
| Solyc03g031860                                   | PSY1 F                 | TTGTTATATACAGGGGGTGGAGTT          |
|                                                  | PSY1 R                 | TAGAGTGGACACAGACCATAGCTC          |
| Solyc10g006880                                   | NOR F                  | CAAAAATTGTCCAAGTTAGGGCTAC         |
|                                                  | NOR R                  | GTGGAGGTCGTCATTAGCATAAAT          |
| Solyc05g012020                                   | RIN F                  | GTAGAATTTGGGGAAGAAACGTC           |
|                                                  | RIN R                  | TATCAATAGTCACATCCCCTTGTG          |
| <b>Primers for bisulfite sequencing analysis</b> |                        |                                   |
| PCR primers                                      | SI_NOR_F1              | GATTGGTYATGTGAAGGATATGTG          |
|                                                  | SI_NOR_R1              | Biotin-CTCRRATARARACAACAAATACRAC  |
|                                                  | SI_NOR_F2              | ATYGATAGAGAYAAGTTGTTGTAAA         |
|                                                  | SI_NOR_R2              | Biotin-ACRCARAACACTTTTATCCTRCACA  |
|                                                  | SI_PSY1_F1             | ATTGTTGAAAGAGAGGGGTGGAA           |
|                                                  | SI_PSY1_R1             | Biotin-CAAAARCCAARTRCTCAATTCCTA   |
|                                                  | SI_PSY1_F2             | GGGTTGTYTATAATGYAGTTATGG          |
|                                                  | SI_PSY1_R2             | Biotin-CCTCRITTCRARTACAACATATCAAA |
|                                                  | SI_CNR_F1              | AAGATAGAGAGGATGATGATGATTAA        |
|                                                  | SI_CNR_R1              | Biotin-TCTCCAATATCTCTRARCARTT     |
|                                                  | SI_CNR_F2              | TGATGGATTTAGGTAGATGAATTAG         |
|                                                  | SI_CNR_R2              | Biotin-TTRCTCACTCTTTCTCTARCTT     |
|                                                  | SI_NOR_pyro1F1         | TGAAGGATATGTGTTGAAA               |
|                                                  | Pyrosequencing primers | SI_NOR_pyro1F3                    |
| SI_NOR_pyro2F1                                   |                        | GAGAYAAGTTGTTGTA AAAA             |
| SI_NOR_pyro2F2                                   |                        | TYAAAYTTYTGTTGTA AAAAT            |
| SI_NOR_pyro2F3                                   |                        | GTTTTYYTTTTAATTAAATG              |
| SI_PSY1_pyro1F1                                  |                        | AATTTGTGTAAGTTTTGTTT              |
| SI_PSY1_pyro1F2                                  |                        | GCGGAATAGAGAATGTG                 |
| SI_PSY1_pyro2F1                                  |                        | AATGYAGTTATGGTTTT                 |
| SI_PSY1_pyro2F2                                  |                        | GTTGATTGTGTTTAGATTAT              |
| SI_CNR_pyro1F1                                   |                        | GATGATTAATTTTTGTTG                |
| SI_CNR_pyro1F2                                   |                        | AGYTGAAGGTGAGAT                   |
| SI_CNR_pyro2F1                                   |                        | ATTTAGGTAGATGAATTAGA              |
| SI_CNR_pyro2F3                                   |                        | AGTGAAAATTATAGTTTAGT              |
| SI_CNR_pyro2F4                                   |                        | ATYAYAAGTGAAAAAGAGTA              |

## References Supplementary Information

- S1. Gonzalez N, Gévaudant F, Hernould M, Chevalier C, Mouras A (2007) The cell cycle-associated protein kinase WEE1 regulates cell size in relation to endoreduplication in developing tomato fruit. *Plant J* 51(4):642-655.
- S2. How Kit A et al. (2010) Functional analysis of SIEZ1 a tomato enhancer of zeste (E(z)) gene demonstrates a role in flower development. *Plant Mol Biol* 74(3):201-213.
- S3. Télef N et al. (2006) Sucrose deficiency delays lycopene accumulation in tomato fruit pericarp discs. *Plant Mol Biol* 62(3):453-469.
- S4. Pfaffl MW (2001) A new mathematical model for relative quantification in real-time RT-PCR. *Nucl Acids Res* 29(9):e45-.
- S5. Gentleman et al. Bioconductor: open software development for computational biology and bioinformatics. *Genome Biology* 2004, 5:R80 doi:10.1186/gb-2004-5-10-r80
- S6. Bolstad, B.M, Irizarry R.A, Astrand, M and Speed T.P. A comparison of normalization methods for high density oligonucleotide array data based on variance and bias. *Bioinformatics*. 2003 Jan 22;19(2):185-93.
- S7. Irizarry R.A., Hobbs, B., Collin, F., Beazer-Barclay, Y.D., Antonellis, K.J., Scherf U and Speed, T.P. Exploration, normalization, and summaries of high density oligonucleotide array probe level data. *Biostatistics* (2003), 4, 2, pp. 249–264
- S8. Tost J, Gut IG (2007) DNA methylation analysis by pyrosequencing. *Nat Protocols* 2(9):2265-2275.
- S9. Mounet F et al. (2009) Gene and metabolite regulatory network analysis of early developing fruit tissues highlights new candidate genes for the control of tomato fruit composition and development. *Plant Physiol* 149(3):1505-1528.
- S10. Tamura K, Stecher G, Peterson D, Filipski A, Kumar S (2013) MEGA6: Molecular Evolutionary Genetics Analysis Version 6.0. *Mol Biol Evol* 30(12):2725-2729.
- S11. Deborde C et al. (2009) Proton NMR quantitative profiling for quality assessment of greenhouse-grown tomato fruit. *Metabolomics* 5(2):183-198.
